# Supplementary material for: Extraction of Active Compounds from Mixtures of Hemp (Cannabis sativa) with Plants of the Zingiberaceae Family
Source: MDPI journal article supplement (doi:10.3390/molecules28237826), 2023-11-28
Supplement: s1 [file s1]

## Supplementary Information

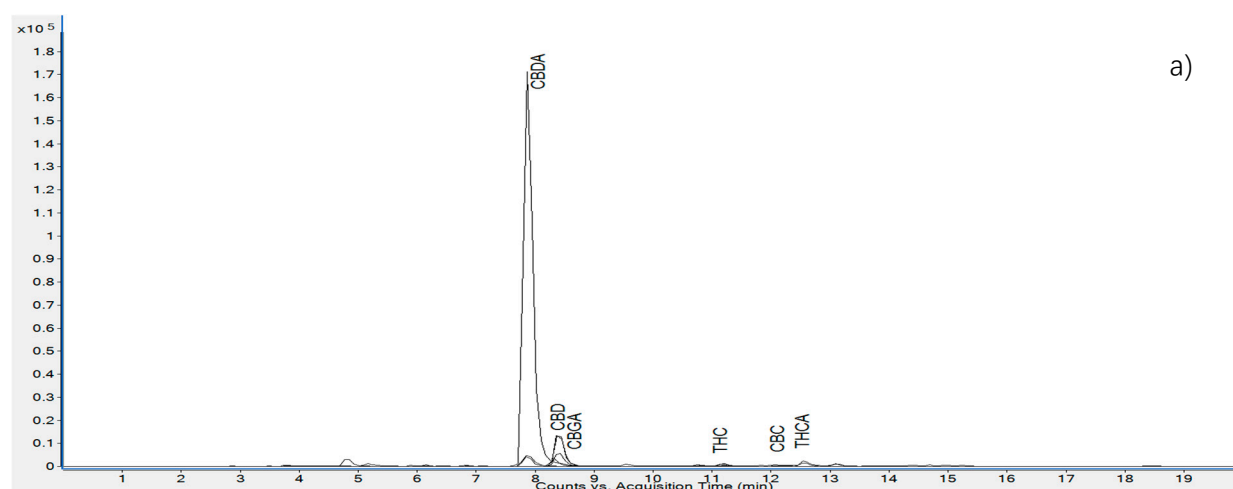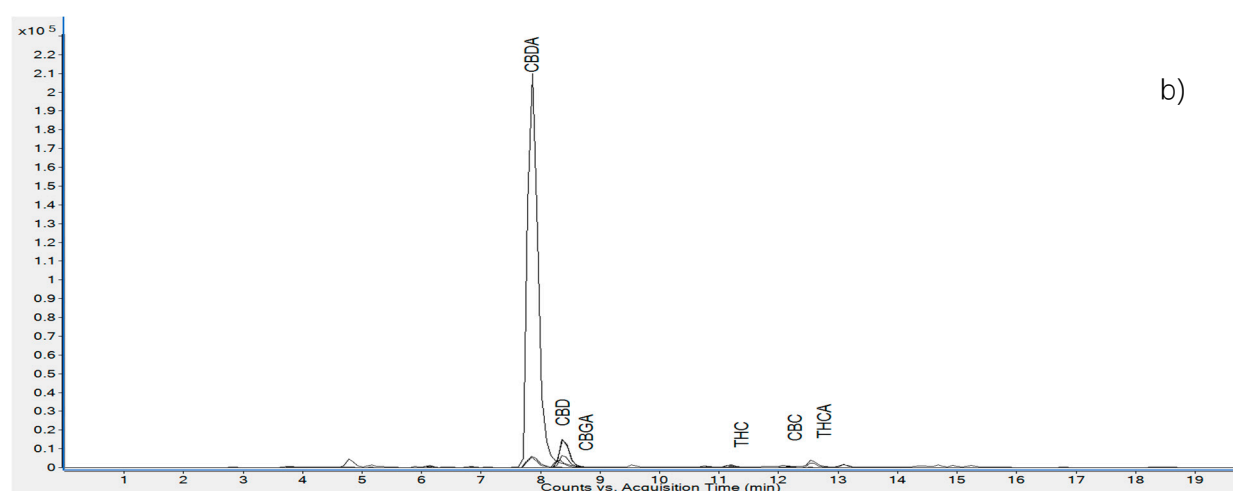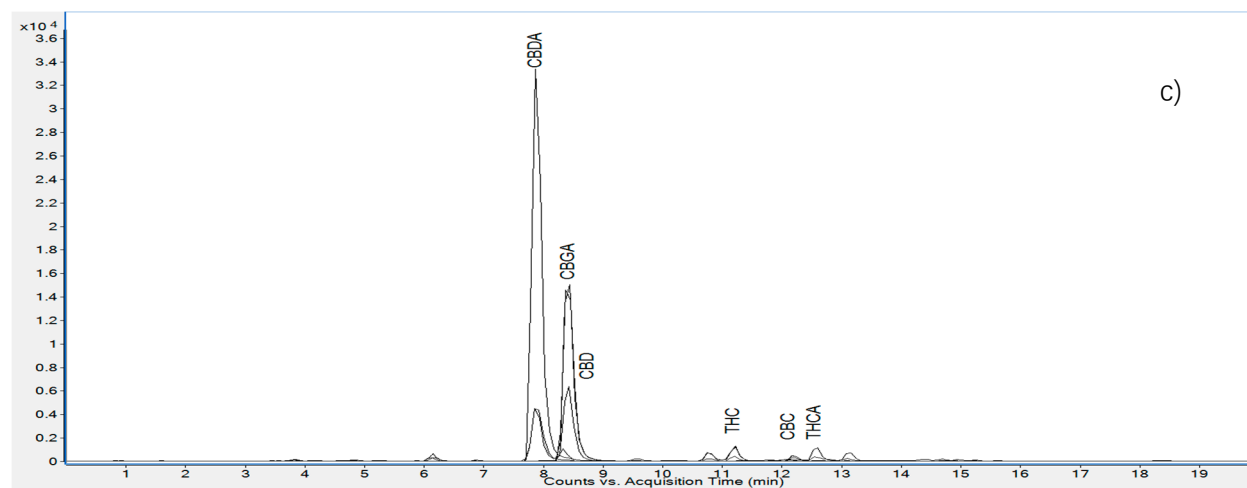

Figure S1: To be continued.

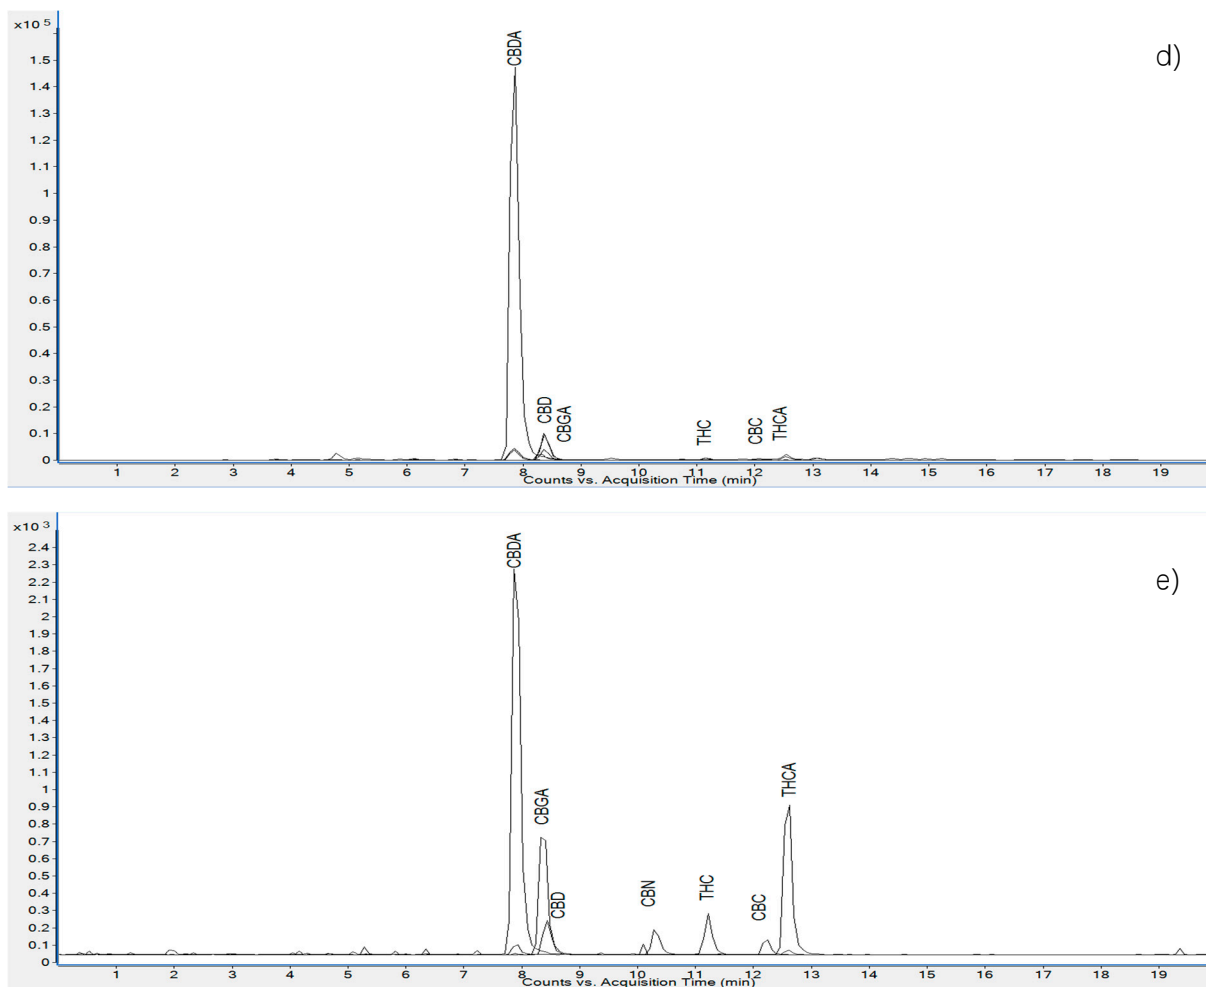

Figure S1: Representative MRM chromatograms obtained for cannabinoid analysis in hemp extract and mixtures: a) hemp extract, b) ginger-hemp extract, c) cardamom-hemp extract, d) turmeric-hemp extract, and e) mixture of seven cannabinoid standards (CBDA, CBGA, THCA, CBD, CBC, CBN and THC)

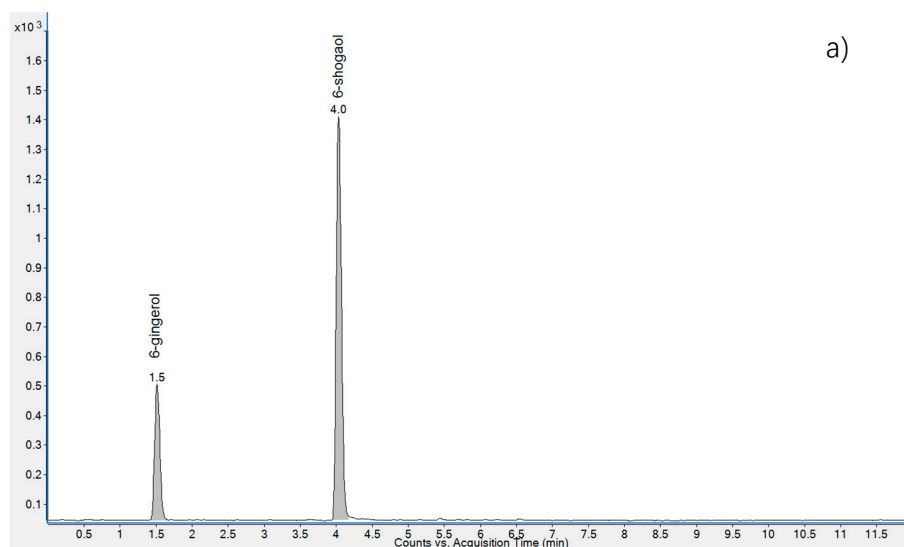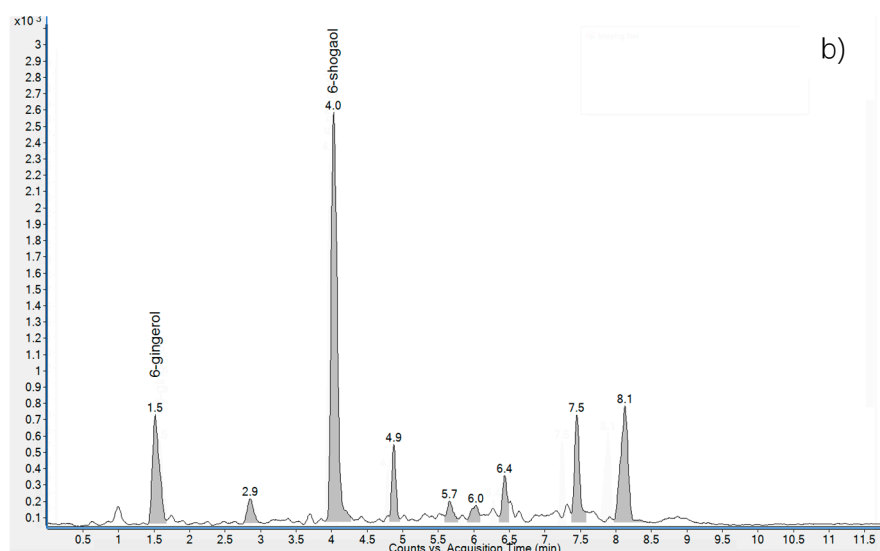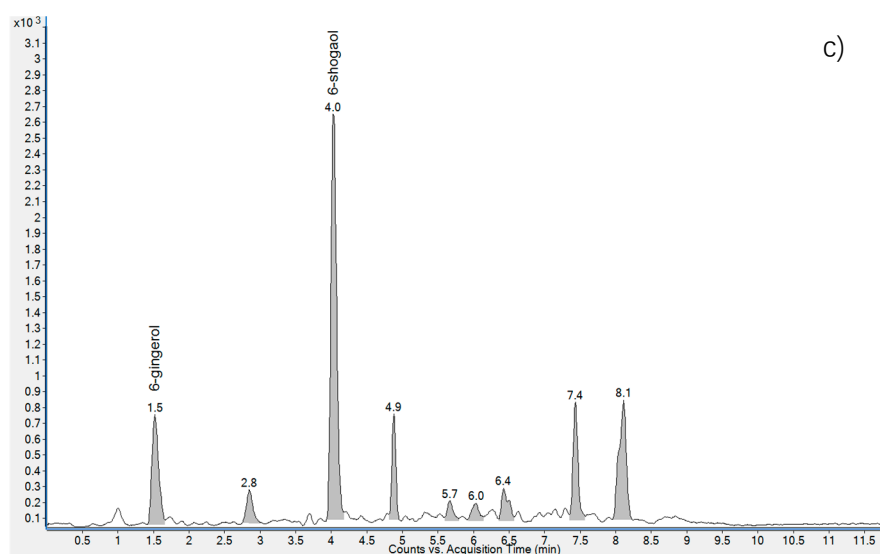

Figure S2: Representative MRM chromatograms of 6-gingerol and 6-shogaol (a), ginger extract (b) and ginger-hemp extract (c). MRM transitions are presented in Table S1.

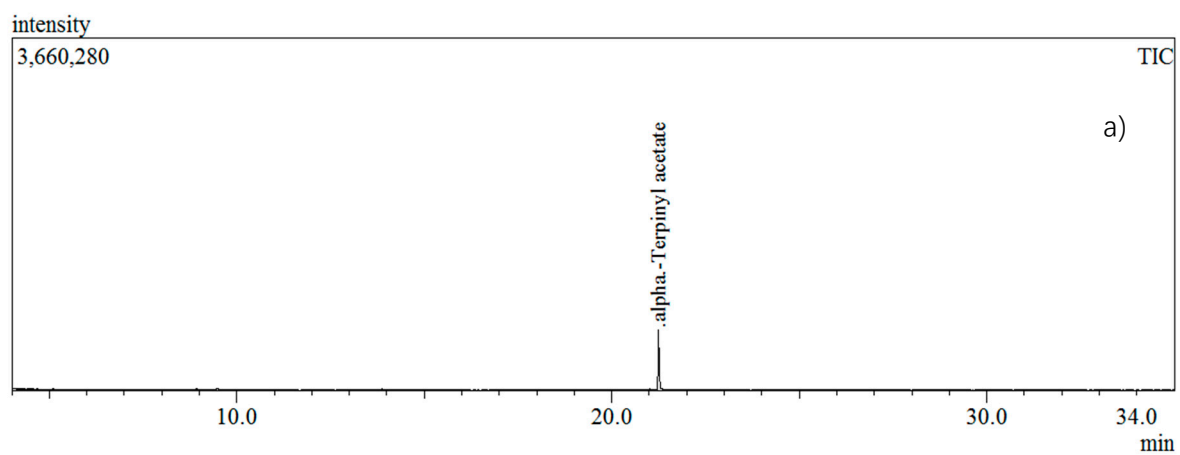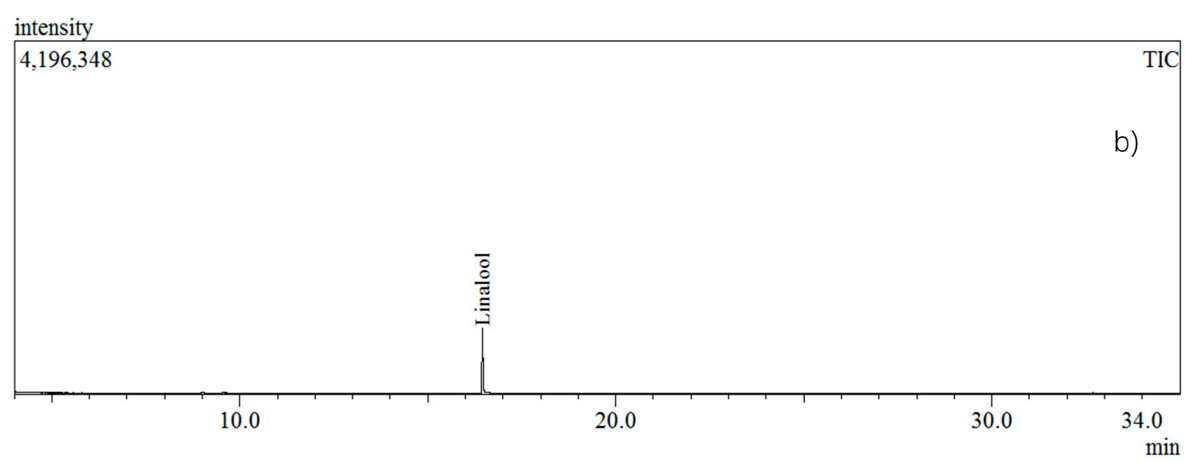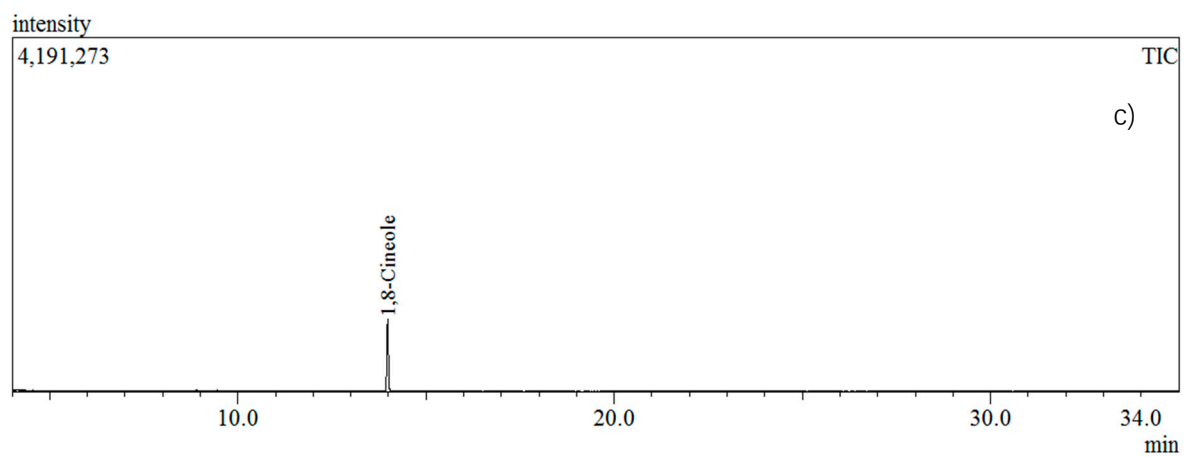

Figure S3: To be continued.

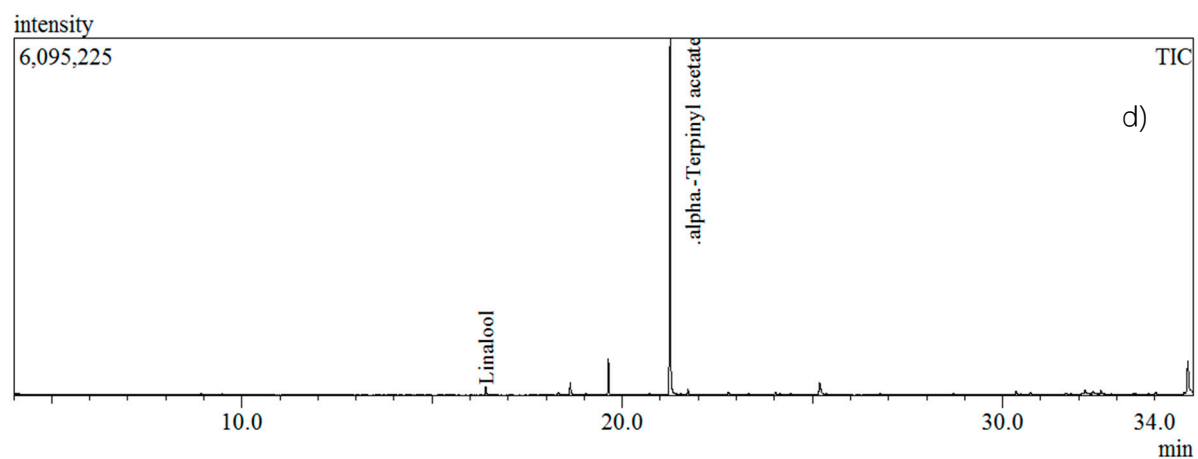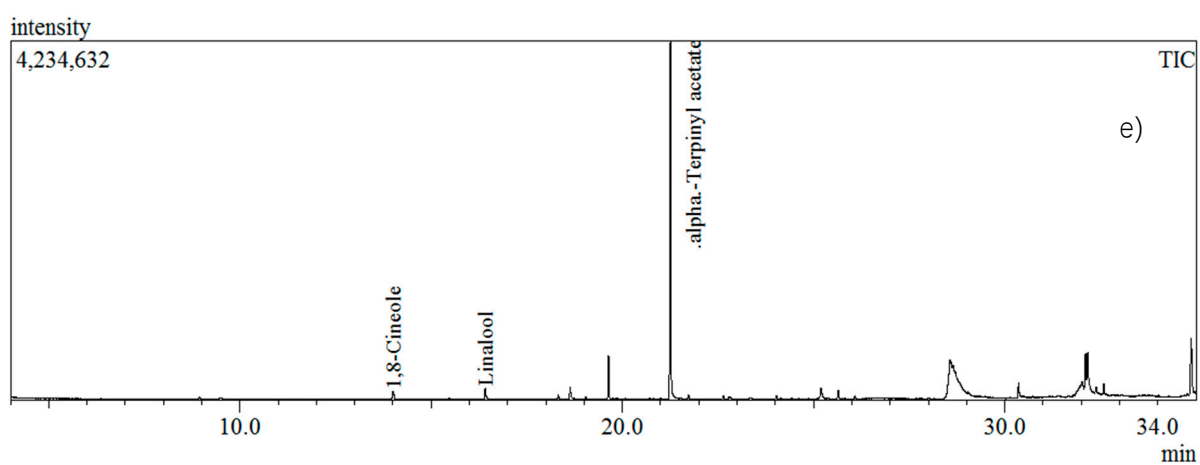

Figure S3: Representative GC-MS chromatograms of alpha-terpynyl acetate (a), linalool (b), 1,8-cineol (c), cardamom extract (d), and cardamom-hemp extract (e).

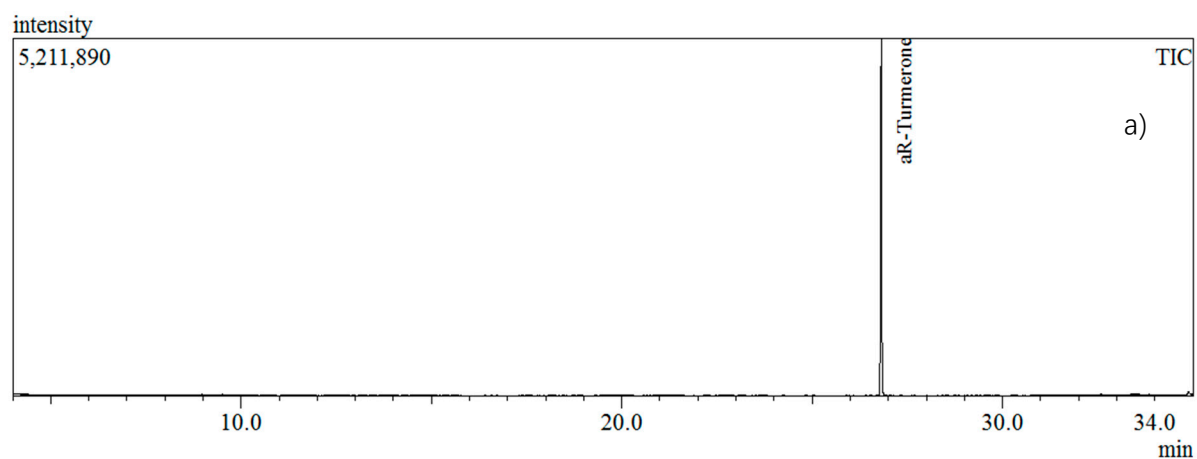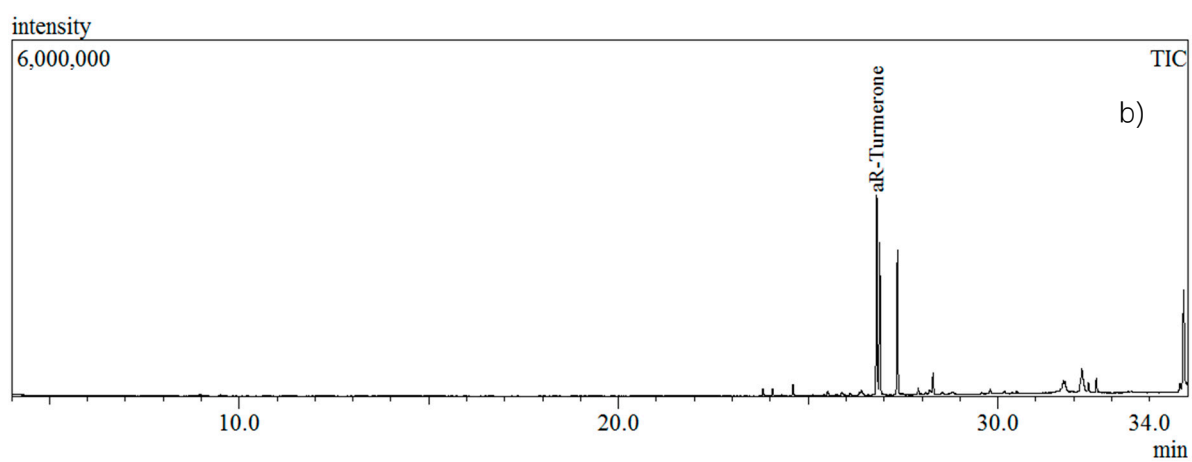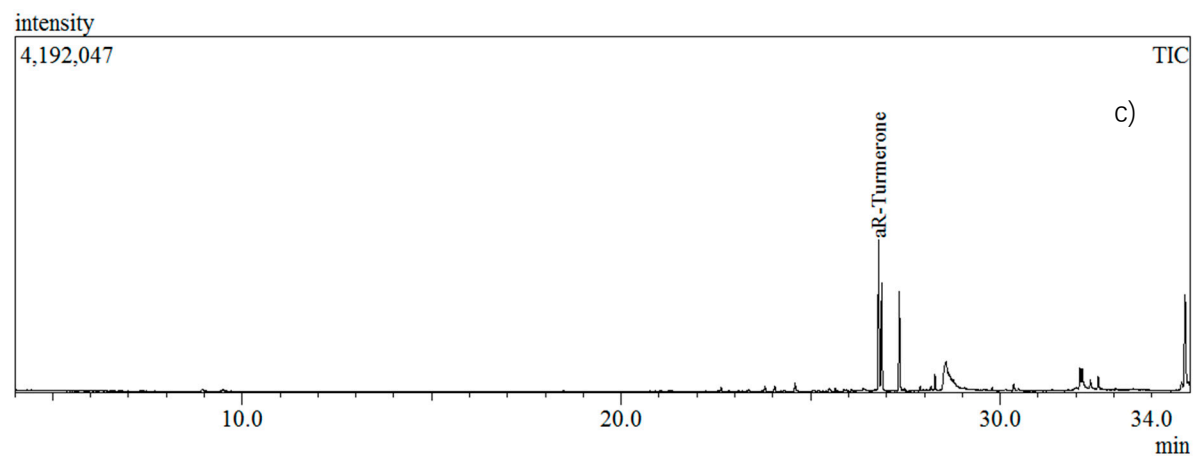

Figure S4: Representative GC-MS chromatogram of aR-turmerone (a), turmeric extract (b) and turmeric-hemp (c) extract.

Table S1: MS/MS fragmentation (MRM) for all quantified compounds.

| Analyte    | Precursor | Fragment     | Collision energy | Polarity |
|------------|-----------|--------------|------------------|----------|
| CBGA       | 361       | 343, 317     | 10, 10           | negative |
| CBDA       | 359       | 341, 218.8   | 10, 30           | negative |
| CBD        | 315.2     | 193.1, 123.1 | 20, 36           | negative |
| THCA       | 357.4     | 313.1, 245.1 | 10, 20           | negative |
| THC        | 315.2     | 193.1, 123.1 | 10, 15           | negative |
| CBN        | 311.2     | 293.1, 223.1 | 16, 20           | negative |
| CBC        | 315.2     | 259.1, 81.1  | 12, 15           | negative |
| 6-gingerol | 317.2     | 277.2, 177.2 | 10, 20           | positive |
| 6-shogaol  | 277.2     | 137.1        | 15               | positive |
